# Supplementary material for: High performance immunoassay using immobilized enzyme in nanoporous carbon
Source: Royal Society of Chemistry journal article supplement (doi:10.1039/b813451k), 2009-01-01
Supplement: b813451k.pdf [file b813451k.pdf]

## **Electronic Supplementary Information**

# **High performance immunoassay using immobilized enzyme in nanoporous carbon**

**Yunxian Piao,<sup>a</sup> Dohoon Lee,<sup>b</sup> Jungbae Kim,<sup>\*c</sup> Jaeyun Kim,<sup>d</sup> Taeghwan Hyeon,<sup>d</sup> and Hak-Sung Kim<sup>\*a</sup>**

<sup>a</sup>*Department of Biological Sciences, Korea Advanced Institute of Science and Technology, Daejeon 305-701, Korea. E-mail: hskim76@kaist.ac.kr*

<sup>b</sup>*Korea Institute of Industrial Technology, 35-3, Hongcheon-ri, Ipjang-myun, Cheonan 330-825, Korea*

<sup>c</sup>*Department of Chemical & Biological Engineering, Korea University, Seongbuk-Gu Anam-Dong 5-Ga 1-Bunji, Seoul 136-701, Korea. E-mail: jbkim3@korea.ac.kr*

<sup>d</sup>*National Creative Research Initiative Center for Oxide Nanocrystalline Materials and School of Chemical and Biological Engineering, Seoul National University, Seoul 151-744, Korea*

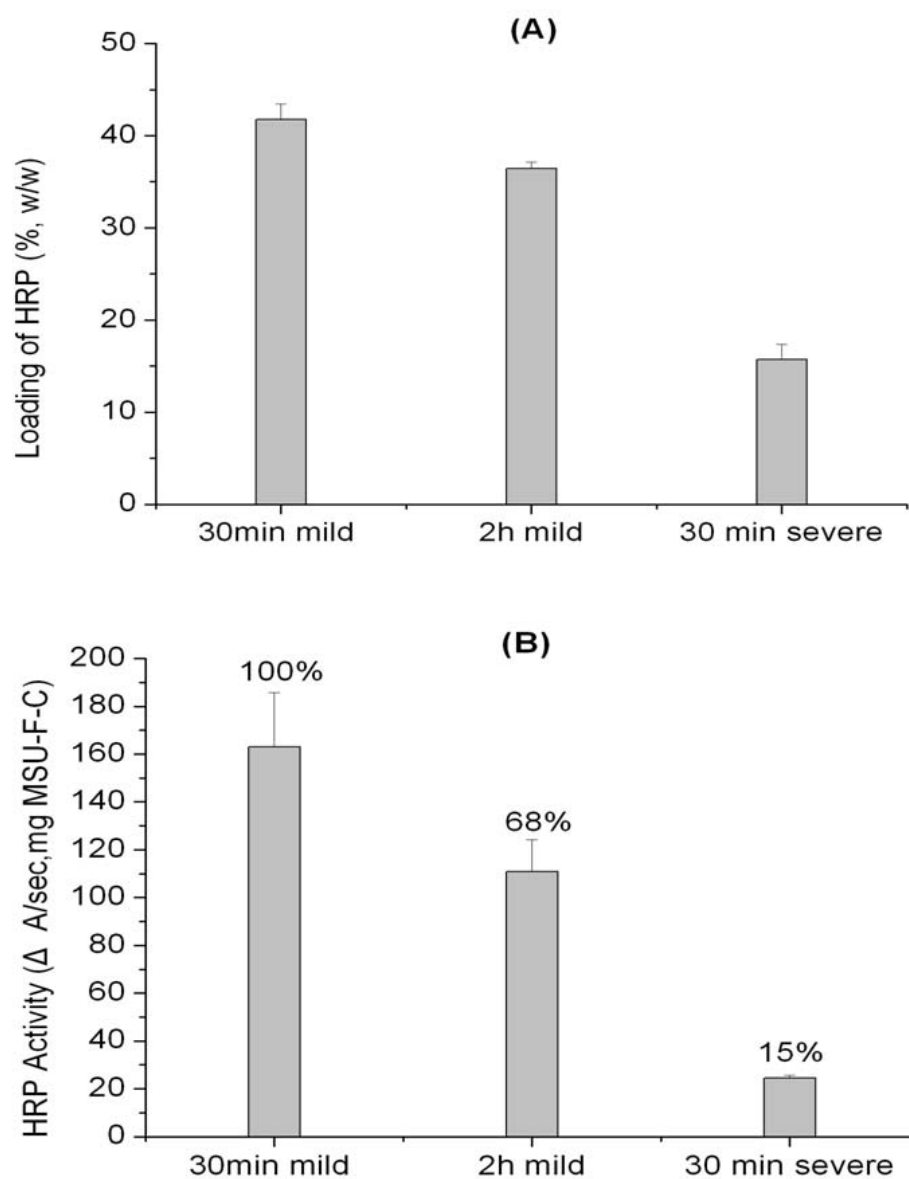

**Fig. S1** Loading of enzymes (A), and activities of immobilized HRP per unit mass of MSU-F-C (B) being treated with acid under different conditions (error bar:  $\pm$  standard deviation, n=3).

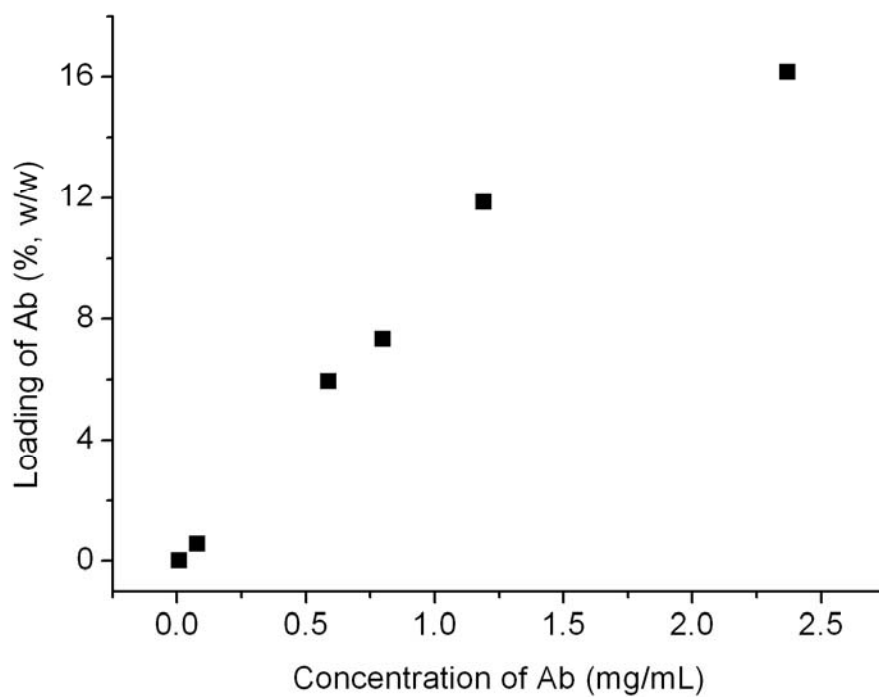

**Fig. S2** Dependence of antibody (Ab) loading on initial concentration. Antibodies were immobilized on MSU-F-C/HRP using EDC/sulfo-NHS as linking reagents.

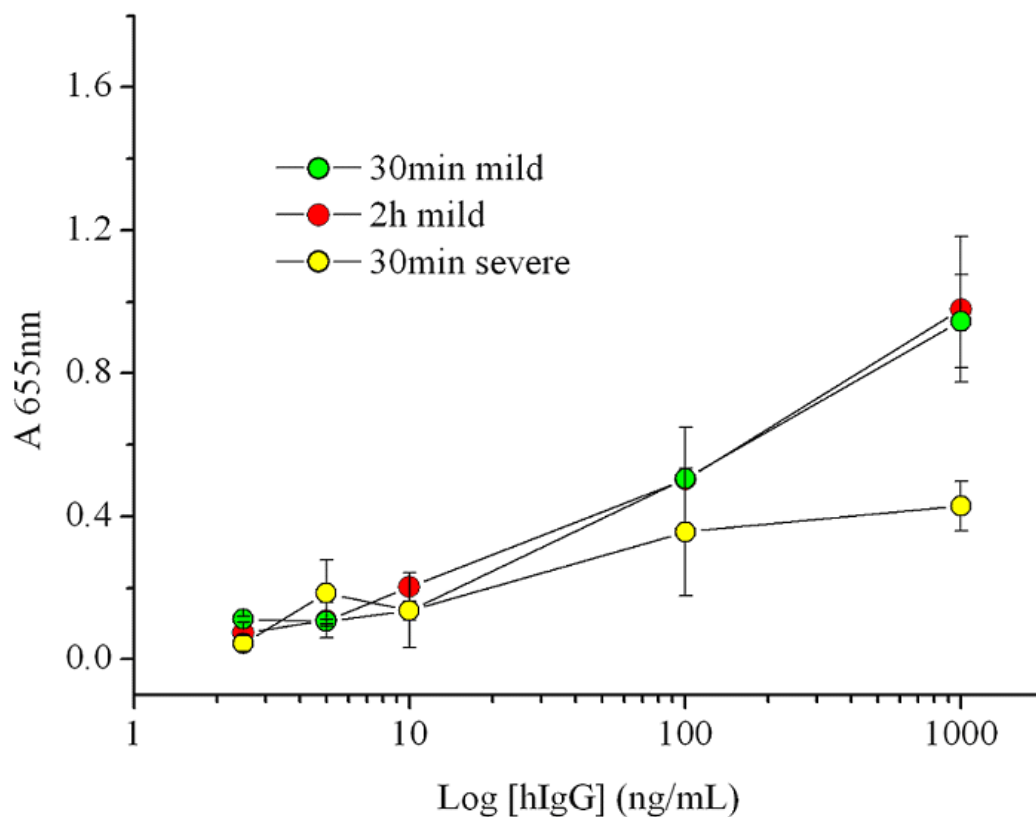

**Fig. S3** Calibration plot for the magnetic-bead based immunoassay of human IgG using MSU-F-C/HRP/anti-human IgG and MB/anti-human IgG. MSU-F-C treated with acid in different conditions were used. The scale bars indicate standard deviations in triplicate experiments.
